# Supplementary material for: D609 protects retinal pigmented epithelium as a potential therapy for age-related macular degeneration
Source: PubMed Central journal article supplement (PMC7054264; doi:10.1038/s41392-020-0122-1), 2020-03-04
Supplement: 41392_2020_122_MOESM2_ESM.pdf [file 41392_2020_122_MOESM2_ESM.pdf]

## Supplementary Materials for

### D609 Protects Retinal Pigmented Epithelium as a Potential Therapy for Age-related Macular Degeneration

**Authors:** Bowen Wang<sup>1†</sup>, Li Wang<sup>1†</sup>, Sijie Gu<sup>1</sup>, Yankun Yu<sup>1</sup>, Huaxing Huang<sup>1</sup>, Kunlun Mo<sup>1</sup>, He Xu<sup>2</sup>, Fanzhu Zeng<sup>2</sup>, Yichen Xiao<sup>1</sup>, Lulu Peng<sup>1</sup>, Chunqiao Liu<sup>1</sup>, Nan Cao<sup>2</sup>, Yizhi Liu<sup>1\*</sup>, Jin Yuan<sup>1\*</sup>, Hong Ouyang<sup>1\*</sup>

**Affiliations:**

<sup>1</sup>State Key Laboratory of Ophthalmology, Zhongshan Ophthalmic Center, Sun Yat-sen University, Guangzhou, China.

<sup>2</sup> Program of Stem Cells and Regenerative Medicine, Fifth Affiliated Hospital, Zhongshan School of Medicine, Sun Yat-Sen University, Guangdong, China.

\*Corresponding author. Email: ouyhong3@mail.sysu.edu.cn (H.O); yuanjincornea@126.com. (J.Y); yizhi\_liu@aliyun.com (Y.L)

†These authors contributed equally to this work.

**This PDF file includes:** Figures. S1 to S5

**Other Supplementary Materials for this manuscript include the following:**

Data S1: D609\_RNASeq\_TPM\_Matrix.xls

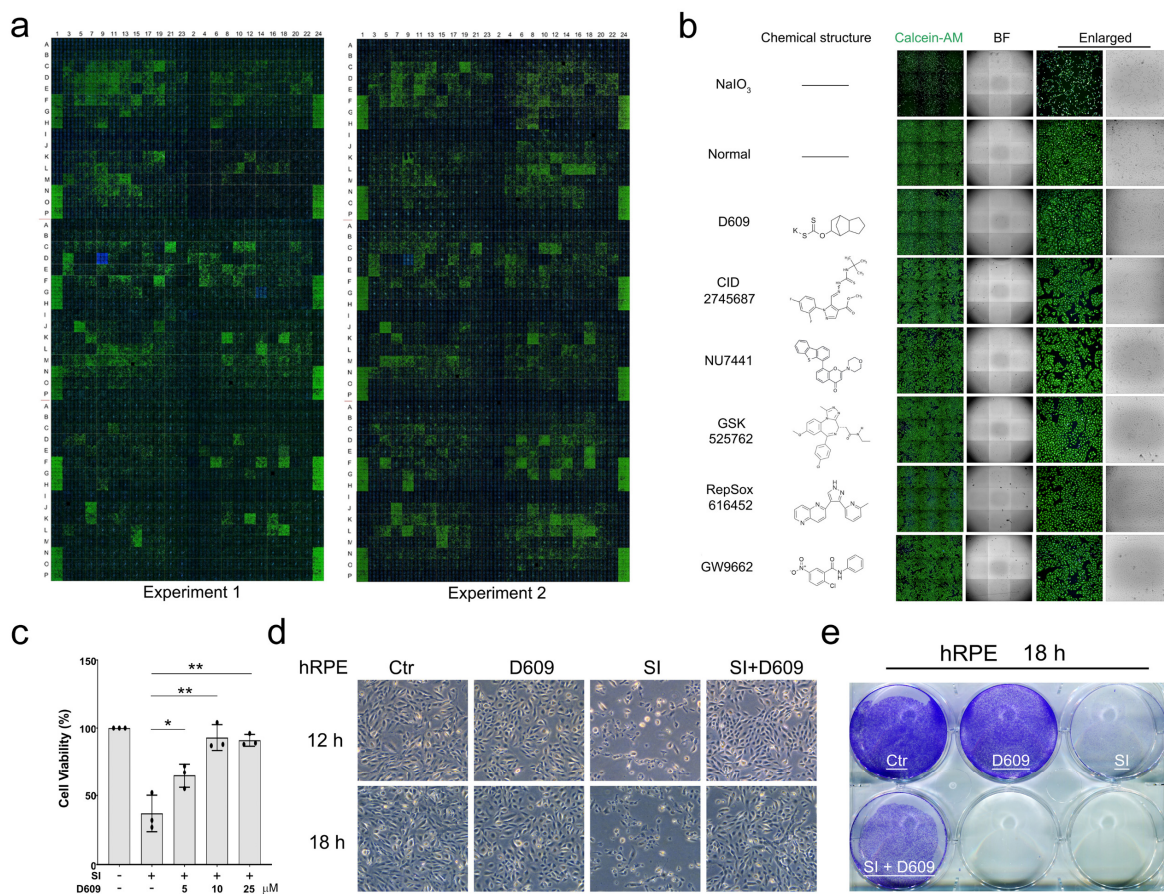

**Figure S1. High-Content screening images of antioxidative damage compounds.** (a) Calcein-AM/Hoechst images of the independent high-content screening experiments. (b) The chemical structures and Calcein-AM/Hoechst images of phase-contrast images of the ARPE-19 cells treated with compounds by preliminary screening, including D609, NU7441, GSK525762, CID 2745687, GW9662, and RepSox 616452. (c) ARPE-19 cells treated with D609 (5  $\mu$ M, 10  $\mu$ M or 25  $\mu$ M), SI (10  $\mu$ M), or combination for 18 hours, and cell viability tested by CCK8-kit. Data are shown as means  $\pm$  SD. (d) Phase-contrast images of hRPE cells treated with D609 (10  $\mu$ M) and/or SI (10  $\mu$ M) at 12 or 18 hours. (e) Crystal violet staining after D609 (10  $\mu$ M) and/or SI (10  $\mu$ M) treatment in hRPE cells. \* $p$  < 0.05, \*\* $p$  < 0.01.  $n$  = 3.

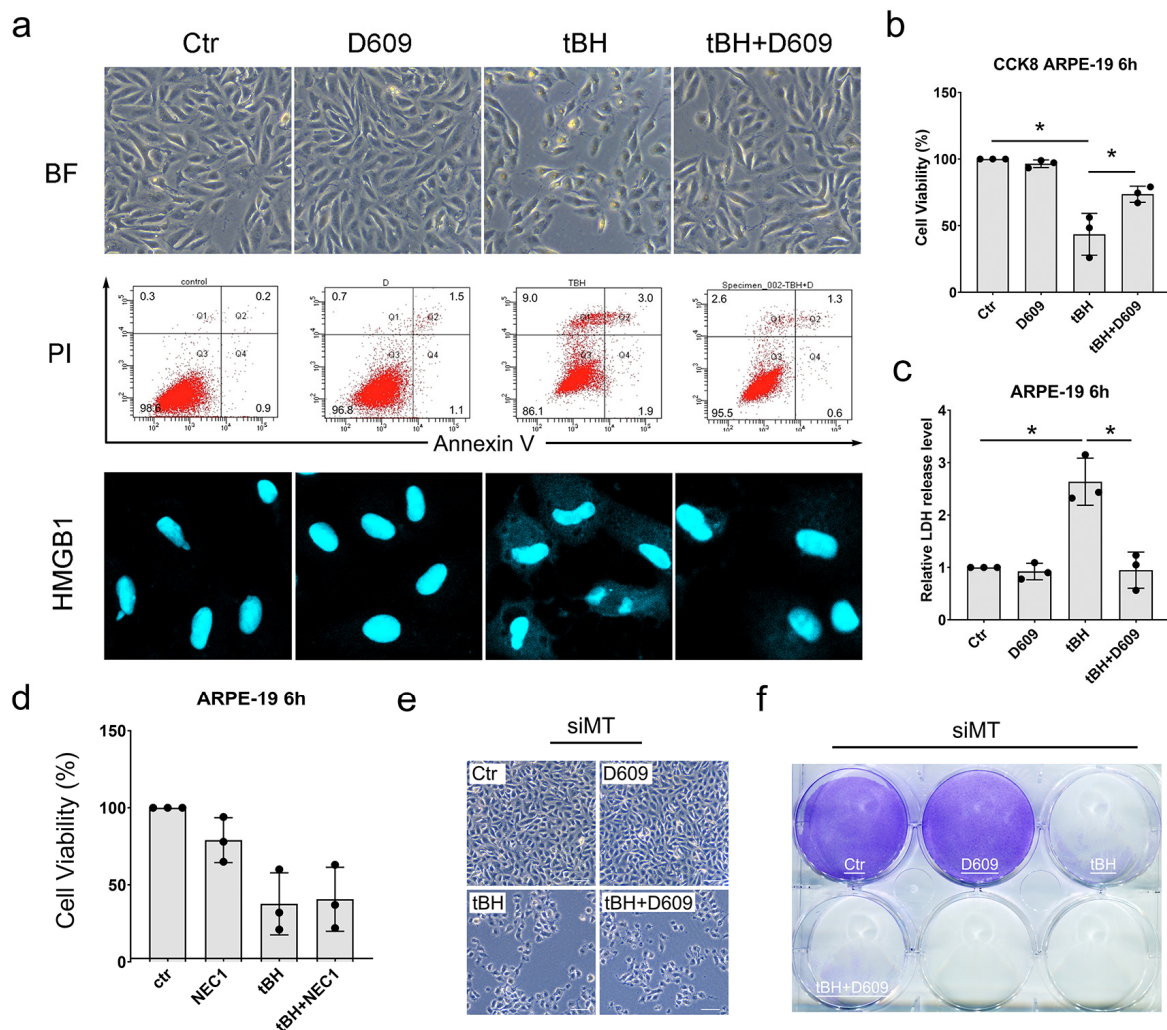

**Figure S2. D609 inhibits tBH induced ARPE-19 cell death.** (a) Upper panel: Phase-contrast images of ARPE-19 cells treated with D609 (10  $\mu$ M), tBH (200  $\mu$ M) or combination for 6 hours; Middle panel: Apoptotic cell death analyzed by flow cytometry using Annexin V and PI double-staining. ARPE-19 cells treated with D609, tBH, or a combination for 6 hours. Quadrant 1 and 2 (PI-positive) represent dead cells, quadrant 2 and 4 represent apoptotic cells; Lower panel: location and expression of HMGB1 in ARPE-19 cells treated with D609, tBH, or combination by immunofluorescence imaging. BF: bright field. (b) Cell viability of ARPE-19 cells treated with D609, tBH, or combination by CCK8-kit. Data are shown as means  $\pm$  SD. (c) LDH release of ARPE-19 cells treated with D609 and/or tBH. Data are shown as means  $\pm$  SD. (d) Cell viability

(CCK8) of fRPE cells treated with 30  $\mu$ M of necroptosis inhibitor necrostatin-1 (Nec-1) and/or tBH (200  $\mu$ M) or combination for 6 hours. Data are shown as means  $\pm$  SD. (e) Phase-contrast bright field (BF) after tBH and/or D609 treatment (6 hours) in MT knockdown ARPE-19 cells. (f) crystal violet staining after tBH and/or D609 treatment (6 hours) in MT knockdown ARPE-19 cells. Data presented are averaged from 3 separate experiments. \* $p < 0.05$ .  $n = 3$ .

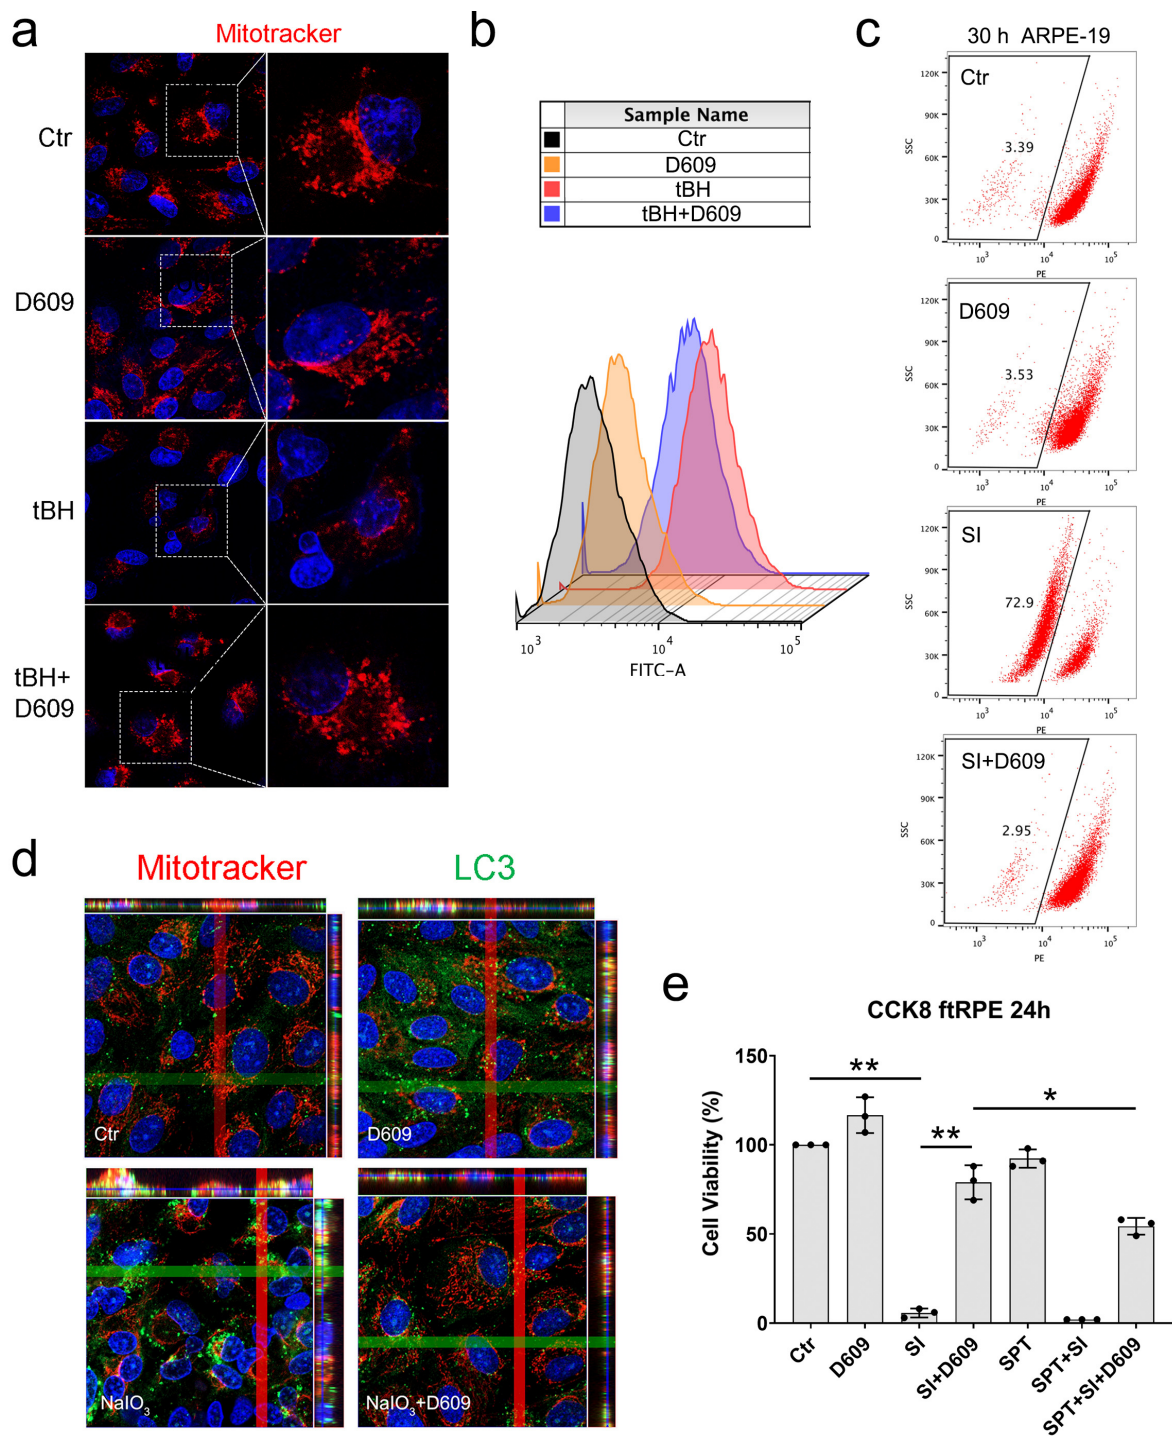

**Figure S3. D609 inhibited mitochondrial dysfunction and ROS production caused by oxidative stress in ARPE-19 cells. (a)** Mitotracker imaging represents the mitochondria mass loss after 6 hours tBH (200  $\mu$ M) treatment in ARPE-19 cells, and the rescue effect of D609. **(b)** ROS

production level of ARPE-19 cells treated with 6 hours of tBH (200  $\mu$ M), D609 (10  $\mu$ M) or combination measured by flow cytometry. (c) MTMP measured in ARPE-19 cells treated with D609 (10  $\mu$ M), SI (10  $\mu$ M) or combination for 30 hours by flow cytometry. (d) 3-D reconstructed image demonstrated the colocalization of autophagosomes (LC3, green) of mitochondria (Mitotracker, red) generated from z-stack scanning. (e) Cell viability of ftRPE cells in the presence or absence of autophagy inhibitor Spautin-1 (10  $\mu$ M) when treated with D609 (10  $\mu$ M) and/or SI (10  $\mu$ M) for 18 hours by CCK8 assay. Data are shown as means  $\pm$  SD. Data presented are averaged from 3 separate experiments. \* $p < 0.05$ , \*\* $p < 0.01$ .

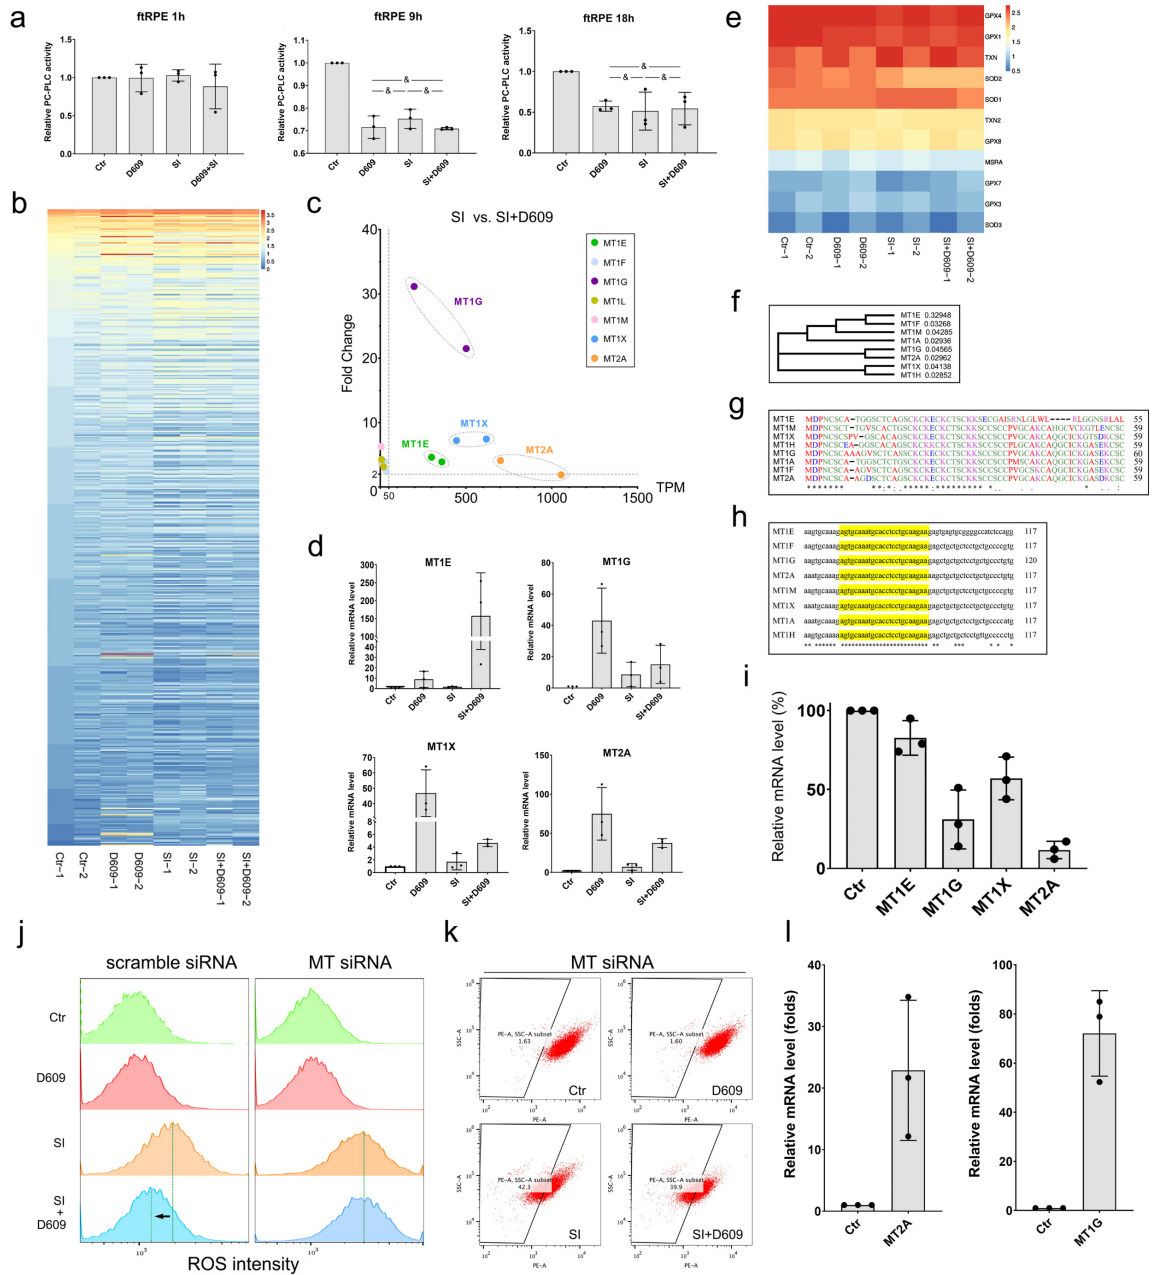

**Figure S4. PC-PLC activity assay, RNA-Seq analysis and conserved region analysis of the MT protein family.** (a) PC-PLC activity measured in ftRPE cells treated with D609 (10  $\mu$ M), SI (10  $\mu$ M) at 1, 9, or 18 hours. &  $p > 0.1$ . Data are shown as means  $\pm$  SD. (b) Heatmaps of the whole genome on the transcription level. (c) The expression fold change and expression level of metallothioneins in the SI-D609 cotreated group compared to the SI-treated group from ftRPE

RNA-seq data. TPM (transcripts per million) **(d)** qPCR result of metallothioneins in ftRPE cells treated with D609 (10  $\mu$ M) and/or SI (10  $\mu$ M) at 12 hours. Data are shown as means  $\pm$  SD. **(e)** Heatmaps of antioxidant family genes on the transcription level. (log<sub>2</sub> of normalized tpm). **(f)** Cluster dendrogram of the metallothionein gene family. **(g)** Amino acid sequence alignment of the metallothionein gene family. **(h)** Alignment of the metallothionein gene family, the highlighted area shows the conserved region of all metallothionein gene family. **(i)** qPCR result of metallothioneins in ftRPE cells treated with siRNA of metallothionein (siMT) for 48 hours, the Ctr is ftRPE cells treated with scrambled siRNA. Data are shown as means  $\pm$  SD. **(j)** ROS production level of ARPE-19 cells treated with SI (10  $\mu$ M) and co-treatment with D609 (10  $\mu$ M) for 6 hours measured by flow cytometry upon MT or scramble siRNA interference. **(k)** Upon MT or scramble siRNA interference, Mitochondrial transmembrane potential (MTMP) measured in ARPE-19 cells treated with D609 (10  $\mu$ M) and/or SI (10  $\mu$ M) for 12 hours by flow cytometry of TMRE staining. **(l)** qPCR result of MT1G and MT2A upon overexpression in ARPE-19 cells by plasmids of MT2A (pcDNA3.1-MT2A-GFP), MT1G (pcDNA3.1-MT1G-GFP) and Ctr vector (pcDNA3.1-GFP) for 48 hours. Data are shown as means  $\pm$  SD. Data presented are averaged from 3 separate experiments. \* indicates conserved amino acid or nucleotide.



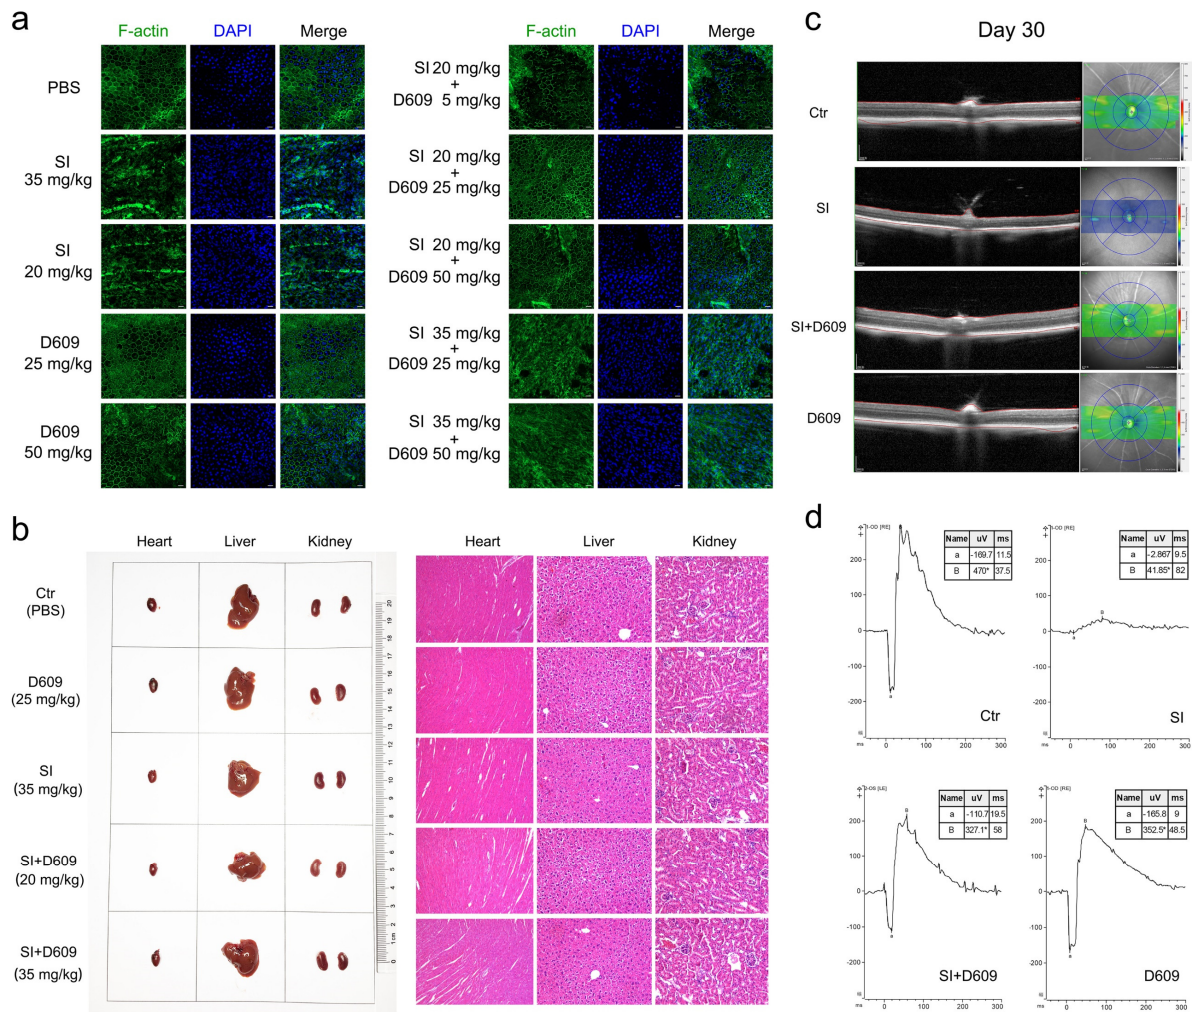

**Figure S5. D609 injection dose determination, major organ toxicity, and physiological function alteration of post-injection in mice. (a)** F-actin structure of day 7 post-injected mouse retina by phalloidin staining. **(b)** Images of the heart, liver, and kidney of mice at day 7 post-injected with D609 (25 mg/kg) and/or SI (20, 35 mg/kg). **(c)** Representative mouse OCT images of the central retina and retinal thickness at day 30 post-injected with D609 (25 mg/kg) and/or SI (20 mg/kg). **(d)** Mouse mesopic ERG responses ( $3\text{cd}\cdot\text{s}\cdot\text{m}^{-2}$ ) recorded at day 30 post-injected with D609 (25 mg/kg) and/or SI (20 mg/kg);  $n = 5$ .
